# Supplementary material for: Transcriptional response of Atlantic salmon families to Piscirickettsia salmonis infection highlights the relevance of the iron-deprivation defence system
Source: PubMed Central journal article supplement (PMC4490697; doi:10.1186/s12864-015-1716-9), 2015-07-04

**A**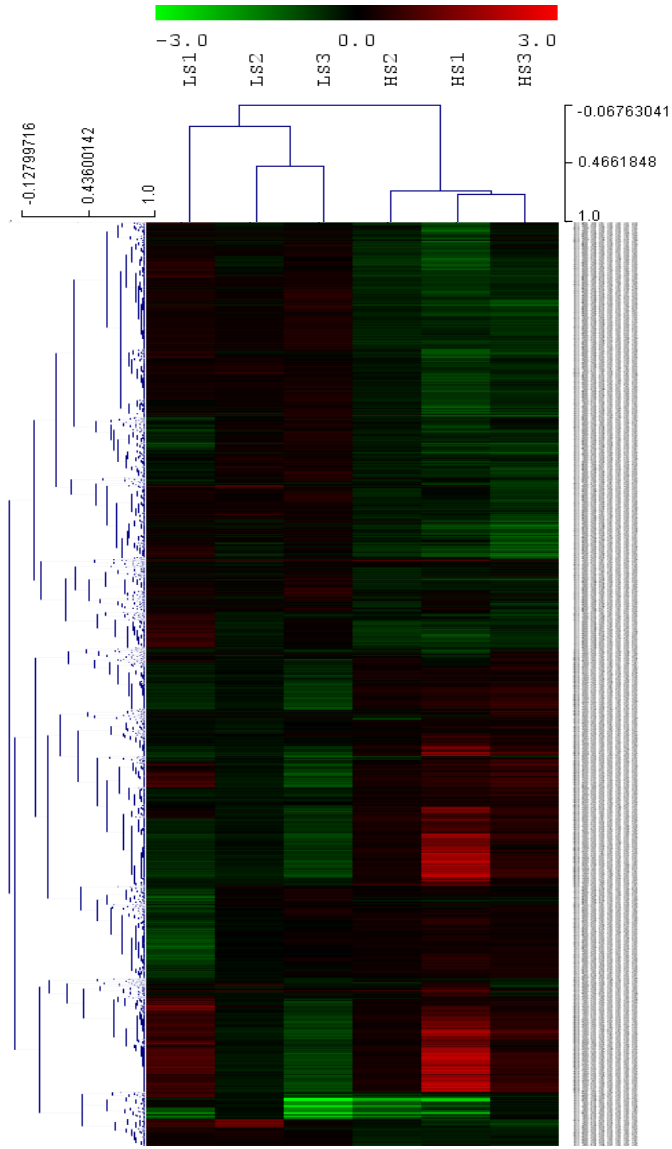**B**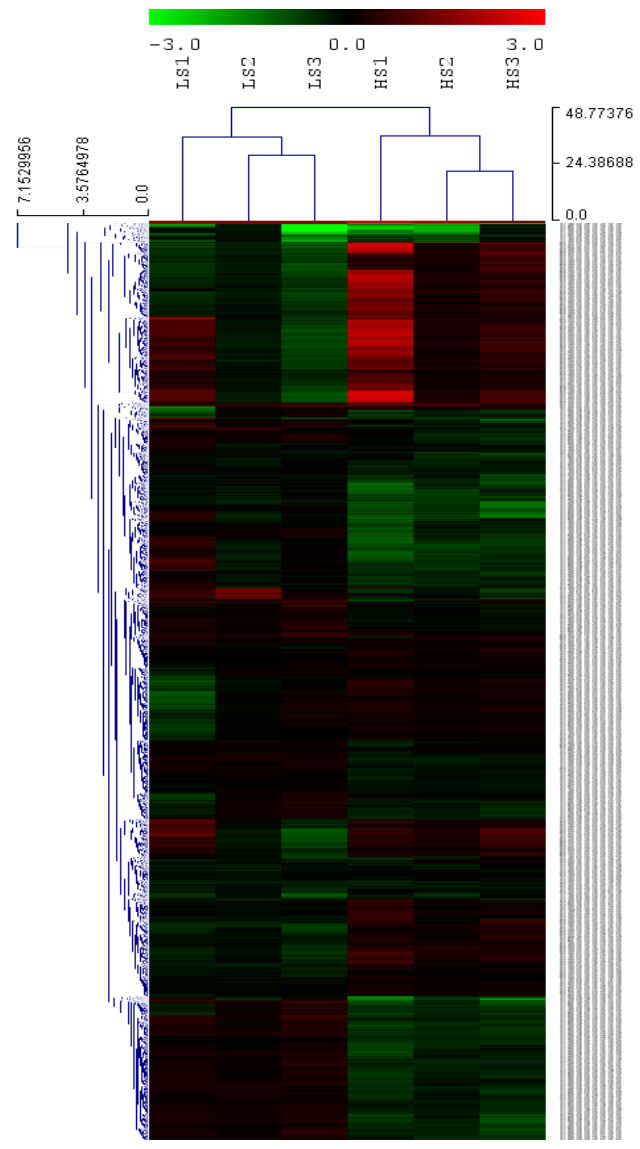

Supplement: 12864_2015_1716_MOESM5_ESM.pdf [file 12864_2015_1716_MOESM5_ESM.pdf]
